# Supplementary material for: Cytological and genetic consequences for the progeny of a mitotic catastrophe provoked by Topoisomerase II deficiency
Source: publisher site journal article supplement (doi:10.18632/aging.102573), 2019-12-08
Supplement: Supplementary file [file aging-v11i23-102573-supplementary-material-SD3.pdf]

## SUPPLEMENTARY TABLES

**Supplementary Table 1. P-value of cross comparisons between the number of cell bodies generated after the 37 °C for 6 h → 25 °C for 16 h regime.**

| <b>Strain/condition</b> | <b>Microcolonies of ≥2 cell bodies<br/>at 37 °C (N)</b> | <b>Microcolonies that rebudded after<br/>25 °C downshift (N)</b> | <b>P-value against <i>top2-5</i><br/>(first row)</b> |
|-------------------------|---------------------------------------------------------|------------------------------------------------------------------|------------------------------------------------------|
| <i>top2-5</i>           | 160                                                     | 26                                                               | -                                                    |
| <i>top2-5</i> (Sorb)    | 89                                                      | 21                                                               | 0.1064                                               |
| <i>top2-5 yca1Δ</i>     | 152                                                     | 35                                                               | 0.086                                                |
| <i>top2-5/top2-5</i>    | 90                                                      | 42                                                               | < 0.0001                                             |

Comparison between microcolonies of ≥2 cell bodies after the 37 °C incubation and re-budding (for at least one cell body) after the 25 °C downshift were performed in 2×2 contingency tables using a one-tailed Fisher's exact test.

**Supplementary Table 2. Summary of chromosome V events in R Hyg<sup>R</sup>/W Hyg<sup>S</sup> sectored colonies of FM1873 and MD684 strains.**

| <b>Strain name<sup>1</sup> and sector pattern<sup>2</sup></b> | <b>Genomic alterations<sup>3</sup></b>                                                                                                                                                 |
|---------------------------------------------------------------|----------------------------------------------------------------------------------------------------------------------------------------------------------------------------------------|
| FM1873-1 (E2)<br>R Hyg <sup>R</sup> /P-W Hyg <sup>S</sup>     | UPD on V in “correct” direction in red sector; partial UPD in “incorrect” direction on V in white sector.                                                                              |
| FM1873-2 (E2)<br>R Hyg <sup>R</sup> /W Hyg <sup>S</sup>       | UPD on V in “correct” direction in red sector; T-LOH on V in “correct” direction in white sector.                                                                                      |
| FM1873-4 (E2)<br>R Hyg <sup>R</sup> /W Hyg <sup>S</sup>       | RCO on V. Breakpoint at 134 kb in red sector and 144 kb in white sector.                                                                                                               |
| FM1873-12 (E2)<br>R Hyg <sup>R</sup> /W Hyg <sup>S</sup>      | RUPD on V.                                                                                                                                                                             |
| FM1873-14 (E2)<br>R Hyg <sup>R</sup> /W Hyg <sup>S</sup>      | RCO on V. Breakpoint at 67 kb in red sector and 76 kb in white sector.                                                                                                                 |
| FM1873-26 (E2)<br>R Hyg <sup>R</sup> /W Hyg <sup>S</sup>      | UPD in correct direction on V in red sector; T-LOH event in correct direction in white sector.                                                                                         |
| FM1873-32 (E2)<br>R Hyg <sup>R</sup> /P Hyg <sup>S</sup>      | RUPD on V                                                                                                                                                                              |
| FM1873-35 (E2)<br>R Hyg <sup>R</sup> /P Hyg <sup>S</sup>      | RUPD on V                                                                                                                                                                              |
| FM1873-37 (E2)<br>R Hyg <sup>R</sup> /P Hyg <sup>S</sup>      | RUPD on V                                                                                                                                                                              |
| FM1873-41 (E2)<br>R Hyg <sup>R</sup> /P Hyg <sup>S</sup>      | RUPD on V                                                                                                                                                                              |
| FM1873-45 (E2)<br>R Hyg <sup>R</sup> /P Hyg <sup>S</sup>      | UPD on V in the correct direction in the red sector (two copies of W303-1A-derived chromosome; white sector has one copy of YJM789-derived homolog and none of W303-1A-derived homolog |
| FM1873-49 (E2)<br>R Hyg <sup>R</sup> /P Hyg <sup>S</sup>      | No obvious changes on V in red sector; white sector has UPD on V in correct direction.                                                                                                 |
| FM1873-50 (E2)<br>R Hyg <sup>R</sup> /P Hyg <sup>S</sup>      | RUPD on V                                                                                                                                                                              |
| FM1873-54 (E2)<br>R Hyg <sup>R</sup> /P Hyg <sup>S</sup>      | RUPD on V                                                                                                                                                                              |
| FM1873-70 (E2)<br>R Hyg <sup>R</sup> /P Hyg <sup>S</sup>      | RUPD on V                                                                                                                                                                              |
| FM1873-85 (E2)<br>R Hyg <sup>R</sup> /P Hyg <sup>S</sup>      | RUPD on V                                                                                                                                                                              |
| FM1873-101 (E2)<br>R Hyg <sup>R</sup> /P Hyg <sup>S</sup>     | RCO on V. Breakpoints at 95 kb and 86 kb in red sector. The red sector has event indicative of a G1-associated DSB, repaired in G2. Breakpoint at 93 kb in white sector.               |
| FM1873-105 (E2)<br>R Hyg <sup>R</sup> /P Hyg <sup>S</sup>     | RUPD on V.                                                                                                                                                                             |
| FM1873-106 (E2)<br>R Hyg <sup>R</sup> /P Hyg <sup>S</sup>     | RUPD on V.                                                                                                                                                                             |
| FM1873-112 (E2)<br>R Hyg <sup>R</sup> /P Hyg <sup>S</sup>     | RUPD on V.                                                                                                                                                                             |
| FM1873-1 (C2)                                                 | UPD on V in “correct” direction in red sector; partial UPD in “incorrect” direction on V in white sector.                                                                              |
| FM1873-2 (C2)                                                 | UPD on V in “correct” direction in red sector; no clear event on V in white sector.                                                                                                    |
| FM1873-3 (C2)                                                 | No detectable events on V.                                                                                                                                                             |
| FM1873-7 (C2)                                                 | No detectable events on V in red sector. In white sector, V has terminal LOH (about 110 kb).                                                                                           |
| FM1873-14 (C2)                                                | RUPD on V.                                                                                                                                                                             |
| FM1873-19 (C2)                                                | UPD on V in red sector; no obvious change on V in white sector.                                                                                                                        |

|                 |                                                                                                                                                                                                 |
|-----------------|-------------------------------------------------------------------------------------------------------------------------------------------------------------------------------------------------|
| FM1873-20 (C2)  | RUPD on V.                                                                                                                                                                                      |
| MD684.1.15 (E2) | RUPD (V)                                                                                                                                                                                        |
| MD684.1.17 (E2) | RUPD (V)                                                                                                                                                                                        |
| MD684.1.49 (E2) | RUPD (V)                                                                                                                                                                                        |
| MD684.1.61 (E2) | Red sector looked like haploid strain (all homologs derived from W303-1A with elevated signal, all derived from YJM789 with reduced signal). UPD on V in white sector                           |
| MD684.1.65 (E2) | Red sector looked like haploid strain (all homologs derived from W303-1A with elevated signal, all derived from YJM789 with reduced signal). In white sector: UPD on V                          |
| MD684.1.73 (E2) | Red sector looked like haploid strain (all homologs derived from W303-1A with elevated signal, all derived from YJM789 with reduced signal). In white sector: UPD on V                          |
| MD684.1.75 (E2) | Red sector looked like haploid strain (all homologs derived from W303-1A with elevated signal, all derived from YJM789 with reduced signal). In white sector, UPD on V.                         |
| MD684.1.83 (E2) | RUPD (V)                                                                                                                                                                                        |
| MD684.1.88 (E2) | Red sector looked like haploid strain (all homologs derived from W303-1A with elevated signal, all derived from YJM789 with reduced signal). In white sector, T-LOH on V (breakpoint at 56 kb). |

<sup>1</sup> Parentheses after the strain name indicate whether the strain was experimental (E2, incubated for six hours at 37 °C in liquid) or control (C2, not incubated at the restrictive temperature).

<sup>2</sup> Strains either treated at 37 °C for six hours (E) or untreated (C) at the restrictive temperature were plated on solid medium containing canavanine. After colonies were formed, we purified cells derived from red and white sectors, and determined whether cells from these sectors were Hyg<sup>R</sup> or Hyg<sup>S</sup> (as indicated in the table). The *hph* marker was located distal to *can1-100* on the W303-1A-derived chromosome. Thus, a reciprocal crossover (RCO) or reciprocal UPD event would be expected to produce a hygromycin-resistant red sector, and a hygromycin-sensitive white sector. Code: T-LOH (terminal LOH event), I-LOH (interstitial LOH event), Tri (trisomy), UPD (uniparental disomy), RCO (reciprocal crossover), and RUPD (reciprocal uniparental disomy).

<sup>3</sup> The arrays for sectored colonies were done with arrays that had dense SNPs for chromosomes I, III, V and VIII, but few SNPs on other chromosomes. Thus, we tabulate only events involving chromosome V.

**Supplementary Table 3. Strains used in this work.**

| Strain name           | Relevant genotype <sup>a</sup>                                                             | Origin                   |
|-----------------------|--------------------------------------------------------------------------------------------|--------------------------|
| CH326                 | (S288C) <i>MATa ura3-52 his4-539am lys2-801am SUC2+ top2-5</i>                             | D. Botstein <sup>b</sup> |
| CH335                 | (S288C) <i>MATa ura3-52 his4-539am lys2-801am SUC2+ TOP2</i>                               | D. Botstein <sup>b</sup> |
| FM1386                | CH326; <i>H2A2(YBL003c):GFP:BleMX; Δbar1::URA3</i>                                         | F. Machin <sup>c</sup>   |
| FM1419 <sup>e</sup>   | CH335; <i>H2A2(YBL003c):GFP:BleMX; Δbar1::URA3</i>                                         | F. Machin <sup>c</sup>   |
| FM1856                | FM1386; <i>Δyca1::kanMX4</i>                                                               | This work                |
| FM1871 <sup>e</sup>   | FM1419; <i>Δyca1::kanMX4</i>                                                               | This work                |
| FM1730 <sup>f</sup>   | <i>MATa/α top2-5/top2-5</i> homozygous diploid (from FM1386)                               | This work                |
| FM1732 <sup>e,f</sup> | <i>MATa/α TOP2/TOP2</i> homozygous diploid (from FM1419)                                   | This work                |
| PSL2                  | (W303a) <i>MATa ade2-1 can1-100 his3-11,15 ura3-1 trp1-1 V9229::HYG V261553::LEU2 RAD5</i> | T. Petes <sup>d</sup>    |
| PSL5                  | (YJM789) <i>MATα ade2-1 ura3 can1Δ::SUP4-o gal2 ho::hisG</i>                               | T. Petes <sup>d</sup>    |
| FM1830 <sup>g</sup>   | PSL2; <i>top2-5:9myc:natMX</i> (1-2 x cXIV)                                                | This work                |
| FM1832                | PSL5; <i>top2-5:9myc:natMX</i>                                                             | This work                |
| FM1873 <sup>g</sup>   | (FM1830 x FM1832) <i>MATa/α top2-5/top2-5</i> hybrid diploid (3-4 x cXIV, cXIIr t-LOH)     | This work                |
| FM2010                | (PSL2 x PSL5) <i>MATa/α TOP2/TOP2</i> hybrid diploid                                       | This work                |
| MD681                 | PSL2 <i>top2-5:9myc:natMX</i> (FM1830 backcrossed with W303 to have 1 x cXIV)              | This work                |
| MD684                 | (MD681 x FM1832) <i>MATa/α top2-5/top2-5</i> hybrid diploid (3-4 x cXIV)                   | This work                |
| BY4743                | <i>MATa/α his3Δ1/his3Δ1 leu2Δ0/leu2Δ0 met15Δ0/MET15 LYS2/lys2Δ0 ura3Δ0/ura3Δ0</i>          | Euroscarf collection     |
| FM1932                | (BY4741) <i>MATa his3Δ1 leu2Δ0 met15Δ0 ura3Δ0; Δbar1::URA3</i>                             | This work                |
| FM1982                | (BY4742) <i>MATa his3Δ1 leu2Δ0 lys2Δ0 ura3Δ0; Δbar1::URA3</i>                              | This work                |
| FM2032                | (FM1932 x 1982) <i>MATa/α bar1Δ/bar1Δ</i>                                                  | This work                |
| FM2056 <sup>f</sup>   | (clone #1 in Supplementary Figure9C) <i>MATa/α bar1Δ/bar1Δ</i> (from FM1932)               | This work                |

<sup>a</sup> Semicolons separate independent transformation events during strain construction. Intermediate strains are omitted.

<sup>b</sup> Described in [8]

<sup>c</sup> Described in [5]

<sup>d</sup> Described in [3]

<sup>e</sup> These strains were used as *TOP2* controls during clonogenic assays (n=3 independent experiments). In all cases, 100% viability was maintained after 0, 3, 6, 9, 12, 24 and 48 h incubations at 37 °C.

<sup>f</sup> These homozygous diploids were made through the one-step marker-free transformation-based protocol described in Supplementary Figure 9.

<sup>g</sup> These strains were shown by SNP and copy number arrays to carry the genome alteration shown between brackets. For instance, the hybrid heterozygous *top2-5/top2-5* diploid FM1873 carried two genome rearrangements when compared to its isogenic *TOP2/TOP2* counterpart: 3-4 copies of cXIV and a t-LOH at cXII right arm.

**Supplementary Table 4. Primers used in this study.**

| Primer name    | Purpose                                                                          | Sequence (5' to 3')                                            |
|----------------|----------------------------------------------------------------------------------|----------------------------------------------------------------|
| Yca1-F (-359)  | To amplify $\Delta yca1::kanMX$ from gDNA                                        | CAATGCATTGGATCTTATTGGC                                         |
| Yca1-R (+1709) | To amplify $\Delta yca1::kanMX$ from gDNA                                        | GTCGAAACAAGAAGAGCAAAC                                          |
| Bar1-F (-196)  | To amplify $\Delta bar1::URA3$ from gDNA                                         | GCCAGCTATTCTGAAACACACCAC                                       |
| Bar1-R (+2316) | To amplify $\Delta bar1::URA3$ from gDNA                                         | AACAGTCTTAGGGAAGTAACGAG                                        |
| Top2-S3        | To tag <i>TOP2</i> at 3' with <i>9xmyc:natMX</i>                                 | GGAAAACCAAGGATCAGATGTTTCGTTCAAT<br>GAAGAGGATCGTACGCTGCAGGTCGAC |
| Top2-S2        | To tag <i>TOP2</i> at 3' with <i>9xmyc:natMX</i>                                 | TATAAAAAGAATGGCGCTTCTCGGATAAAT<br>ATTATTCAATCGATGAATTCGAGCTCG  |
| Top2-F (-175)  | To amplify top2-5: <i>9xmyc:natMX</i> from gDNA                                  | AAGACGCGCCAGTAGGACGC                                           |
| Top2-R (+4511) | To amplify top2-5: <i>9xmyc:natMX</i> from gDNA                                  | CGCACGATGTTTTTCGCCAGG                                          |
| Xreg-F         | To amplify $Y\alpha$ region in the MAT locus ( $Y\alpha$ transformation product) | TTGTTGGCCCTAGATAAGAA                                           |
| MAT-R (+2894)  | To amplify the MAT locus ( $Y\alpha$ transformation product)                     | CAAGGGAGAGAAGACTTGTG                                           |

**Supplementary Table 5. Landscape of possible outcomes during microcolony experiments.**

| After 37 °C (Top2 inactivation)         | After 25 °C reincubation (Top2 re-activation)                                                                                                                                                                                                                      |
|-----------------------------------------|--------------------------------------------------------------------------------------------------------------------------------------------------------------------------------------------------------------------------------------------------------------------|
| 0 (lysis)                               | ---<br>0 (lysis)                                                                                                                                                                                                                                                   |
| 1 (did not bud)                         | 1 (remained unbudded)<br>2 (able to bud once Top2 is back)<br>3, 4, 5, etc. (short-term budding capability)<br>>20-50 (will raise a viable population)                                                                                                             |
| 2 (did bud once without Top2)           | 0 (double lysis)<br>1 (one body lysed; the other did not divide again)<br>2 (no more budding even after Top2 reactivation)<br>3 (one body able to bud once Top2 is back)<br>4, 5, etc. (both bodies able to bud*)<br>>20-50 (at least one body/cell is viable)     |
| 3 (did bud twice without Top2)          | 0, 1, 2 (no more budding and some bodies lysed)<br>3 (no more budding even after Top2 reactivation)<br>4 (1 of 3 bodies rebudded once)<br>5 (2 of 3 bodies rebudded once*)<br>6, etc. (3 of 3 bodies rebudded once *)<br>>20-50 (at least one body/cell is viable) |
| 4 (mother and daughter rebudded again*) | 0, 1, 2, 3 (no more budding and some bodies lysed)<br>4 (no more budding even after Top2 reactivation)<br>5, 6, 7, 8, 9 (1-4 of 4 bodies rebudded once*)<br>>20-50 (at least one body/cell is viable)                                                              |
| Etc.                                    | Etc.                                                                                                                                                                                                                                                               |

\* Other interpretations on the origin of these microcolonies are possible.
